# Supplementary material for: Facile fabrication of highly flexible graphene paper for high-performance flexible lithium ion battery anode
Source: Royal Society of Chemistry journal article supplement (doi:10.1039/c4ra13164a), 2014-12-04
Supplement: c4ra13164a1.pdf [file c4ra13164a1.pdf]

[Electronic Supplementary Information]

## Facile Fabrication of Highly Flexible Graphene Paper for High-Performance Flexible Lithium Ion Battery Anode

Mokwon Kim,<sup>1</sup> DoYoub Kim,<sup>2</sup> Yongku Kang,<sup>2</sup> O Ok Park\*<sup>1</sup>

<sup>1</sup>*Department of Chemical and Biomolecular Engineering (BK21+ graduate program), Korea Advanced Institute of Science and Technology (KAIST), 291 Deahak-ro, Yuseong-gu, Daejeon 305-701, Republic of Korea.*

<sup>2</sup>*Advanced Materials Division, Korea Research Institute of Chemical Technology (KRICT), 141 Gajeong-ro, Yuseong-gu, Daejeon 305-600, Republic of Korea.*

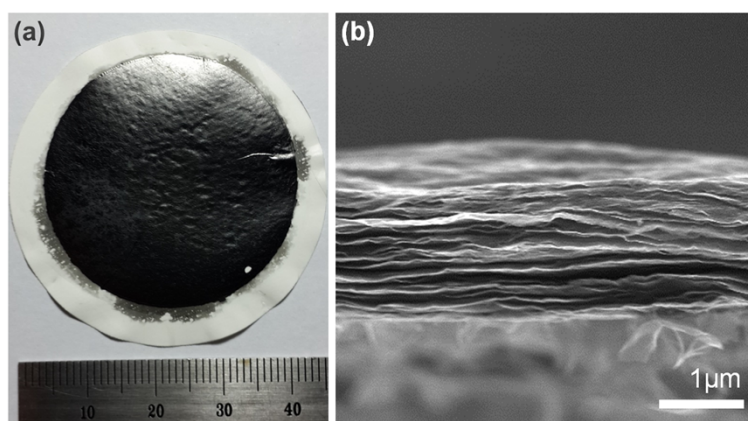

**Fig. S1** a) Optical and b) SEM images of reduced graphene oxide (rGO) paper with the same amount of graphene derivatives for the GNP/GO paper. The rGO paper was fabricated by a vacuum filtration using GO dispersion after chemical reduction by hydrazine solution, showing highly stacked layer structure with a thickness of approximately 2 μm due to GOs' high dispersion stability in water, which is consistent with what have been found by others.<sup>S1,S2</sup>

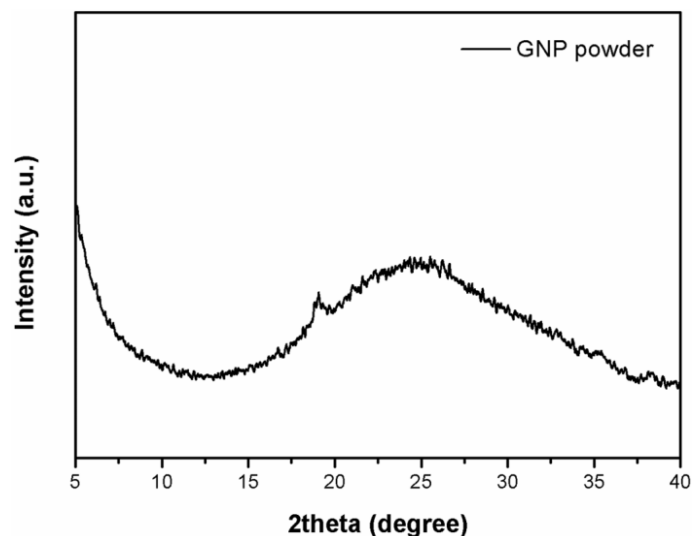

**Fig. S2** XRD pattern of GNP powder used in this study, showing only a broad peak around  $2\theta = 25^\circ$ , which indicates poor long-range ordering of graphene sheets like general graphene aerogels. In addition, there was no sharp peak centered at  $2\theta = 26.5^\circ$ , which corresponds to the folded structure of graphene layers. Peak centered at  $2\theta = 26.5^\circ$  was observed only in the case of the GNP/GO paper, indicating that local folded and corrugated morphology of graphene layers has been developed by the effective control of assembling process with intrinsically wrinkled GNP sheets.

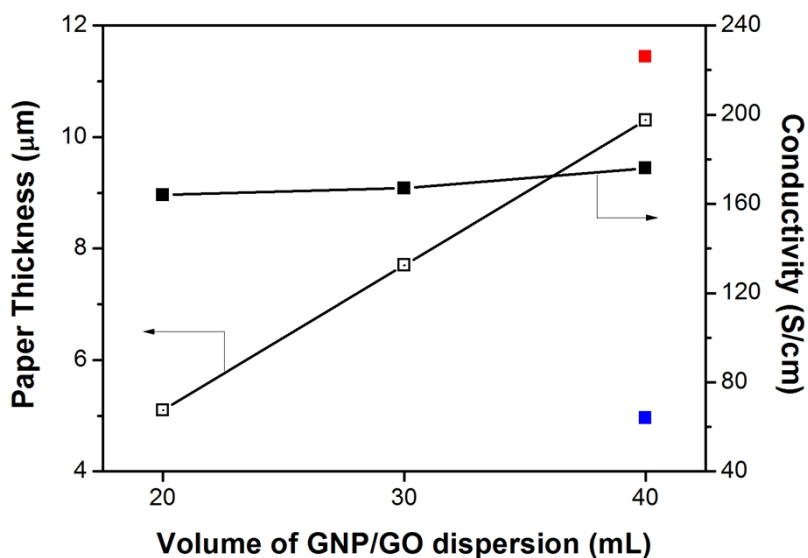

**Fig. S3** Thickness of the GNP/GO paper can be controlled by varying the volume of GNP/GO dispersion for a vacuum filtration (filtering diameter: *ca.* 37 mm). Conductivity of the GNP/GO paper was slightly increased as the thickness of the paper was increased. Blue and red squares in the graph indicate the conductivity of papers with 40 mL of GNP/GO dispersion after thermal annealing at 350 °C for 1 h in an air, and with GNP/GO dispersion with a weight ratio of 2/1, respectively.

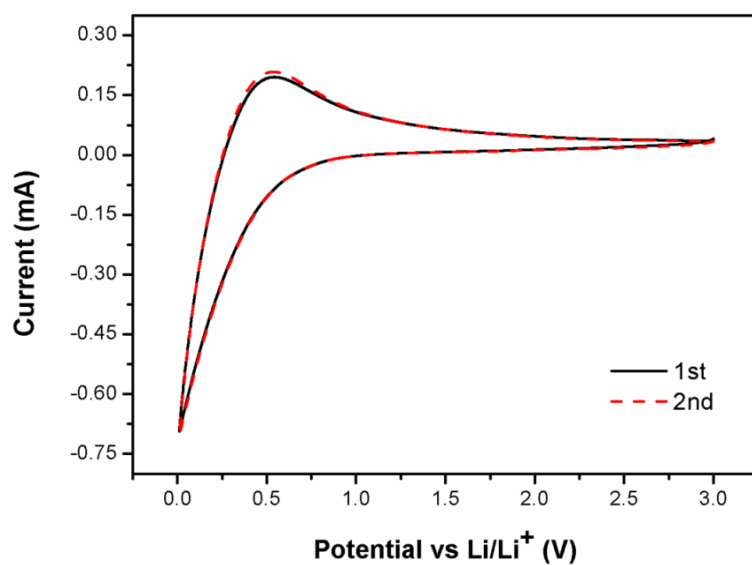

**Fig. S4** CV curves for the GNP/GO paper that was thermally annealed at 350 °C for 1 h in an air.

**Table S1.** BET surface area of the rGO paper, the GNP/GO paper, and pristine GNP powder.

|                                                                  | rGO paper | GNP/GO paper | pristine GNP powder  |
|------------------------------------------------------------------|-----------|--------------|----------------------|
| surface area<br>[m <sup>2</sup> g <sup>-1</sup> ] <sup>[a]</sup> | 52.8      | 278.9        | > 400 <sup>[b]</sup> |

<sup>[a]</sup> BET surface areas were determined with a gas sorption analyzer (Belsorp-max).

<sup>[b]</sup> This value was acquired from a technical data sheet provided from the Angstrom Materials.

## References

- S1 H. Chen, M. B. Müller, K. J. Gilmore, G. G. Wallace, D. Li, *Adv. Mater.*, 2008, **20**, 3557–3561.  
 S2 C. Wang, D. Li, C. O. Too, G. G. Wallace, *Chem. Mater.*, 2009, **21**, 2604–2606.
